# Supplementary material for: Intense pulsed light plus meibomian gland expression versus intense pulsed light alone for meibomian gland dysfunction: A randomized crossover study
Source: PubMed Central journal article supplement (PMC7932142; doi:10.1371/journal.pone.0246245), 2021-03-04
Supplement: pone.0246245.s004.pdf [file pone.0246245.s004.pdf]

# Intense Pulsed Light plus Meibomian Gland Expression versus Intense Pulsed Light alone for Meibomian Gland Dysfunction: A Randomized Crossover Study

*By* Dong Hui Lim

1 **Intense Pulsed Light plus Meibomian Gland Expression versus Intense Pulsed Light alone for Meibomian**  
2 **Gland Dysfunction: A Crossover Study**

3  
4 Kyoung Yoon Shin, MD<sup>1\*</sup>, Dong Hui Lim, MD, PhD<sup>1\*</sup>, Chan Hee Moon, MD<sup>2</sup>, Byung Jin Kim, MD<sup>2†</sup>, Tae-  
5 Young Chung, MD, PhD<sup>1†</sup>

6 <sup>1</sup>Department of Ophthalmology, Samsung Medical Center, Sungkyunkwan University School of Medicine,  
7 Seoul, Republic of Korea

8 <sup>2</sup>Department of Ophthalmology, Samsung Eye Clinic, Seoul, Republic of Korea

9  
10 <sup>18</sup>These authors contributed equally as first authors.

11 <sup>†</sup>These authors contributed equally as corresponding authors.

12

13 **Correspondence**

14 Tae-Young Chung, MD, PhD <sup>3</sup>

15 Department of Ophthalmology, Samsung Medical Center, Sungkyunkwan University School of Medicine, 81  
16 Irwon-ro, Gangnam-gu, Seoul 06351, Republic of Korea

17 Tel: 82-2-3410-3548; Fax: 82-2-3410-0074; E-mail: tychung@skku.edu

18

19 Byung Jin Kim, MD

20 Department of Ophthalmology, Samsung Eye Clinic, 114, Olympic-ro, Songpa-gu, Seoul 05558, Republic of  
21 Korea <sup>3</sup>

22 Tel: 82-2-424-7523; Fax: 82-2-3410-0074; E-mail: feeloph@naver.com

23

24 **Running Head:** IPL plus MGX versus IPL alone for MGD

25

26 <sup>11</sup>**Keywords:** meibomian gland dysfunction, meibomian gland expression, intense pulsed light

27 **ABSTRACT**

28 **Purpose:** To investigate the comparative efficacy of intense pulsed light (IPL) therapy alone with that of IPL  
29 plus meibomian gland expression (MGX) for meibomian gland dysfunction (MGD).

30 **Methods:** This is a prospective randomized crossover clinical trial. Sixty patients were enrolled and randomly  
31 assigned to two groups. All of patients underwent four treatment sessions in total, which were two weeks apart.  
32 Group 1 underwent two sessions of IPL therapy with MGX, as well as two sessions of IPL alone. Group 2  
33 received two sessions of IPL therapy alone, and two sessions of IPL therapy with MGX. The following  
34 parameters were measured at baseline (BL), 2 weeks after the second treatment session (FU1), and 2 weeks after  
35 the fourth treatment session (FU2): tearfilm break-up time (BUT), Oxford grade for corneal staining, meibomian  
36 gland expressibility (MGE), meibum quality (MQ), and ocular surface disease index (OSDI). The separate effect  
37 of MGX on improvement of MGD parameters was evaluated using generalized estimating equation (GEE).

38 **Results:** The mean age of the participants was  $57.52 \pm 10.50$  years. The BUT, Oxford grade, MGE, MQ, and  
39 OSDI of both groups improved significantly (from baseline) by the end of four treatment sessions (FU2  
40 compared to BL; all p-values <0.05). The MGE and MQ significantly improved after the first and second  
41 treatment sessions (FU1 compare to BL; all p-values < 0.001). However, the improvement was not statistically  
42 significant after the third and fourth treatment sessions (FU2 compared to FU1; p-value of 0.388 for MGE and  
43 0.645 for MQ in group 1, 0.333 for MGE and 0.333 for MQ in group 2). The IPL plus MGX therapy produced  
44 greater improvements in the BUT scores than did IPL therapy alone (p=0.003 by GEE). In contrast, the Oxford  
45 grade, MGE, MQ, and OSDI were not influenced by the addition of MGX to IPL (p=0.642, 0.663, 0.731, and  
46 0.840, respectively by GEE).

47 **Conclusion:** IPL therapy effectively improves the subjective symptoms and objective ocular findings of MGD.  
48 MGX enhanced the improvement of BUT driven by IPL therapy. The meibomian gland function (MGE and MQ)  
49 recovers faster in response to IPL therapy than did the other parameters.

50 **INTRODUCTION**

51 <sup>6</sup> Meibomian gland dysfunction (MGD) is a chronic, diffuse abnormality of the meibomian glands which  
52 results in qualitative or quantitative changes in the secretion of meibom. MGD affects <sup>9</sup> the tear film and causes  
53 eye irritation/inflammation, and ocular surface disease.<sup>1</sup> MGD is one of the most common disorders encountered  
54 in ophthalmology clinics and is considered to be a major cause of dry eye syndrome.<sup>2,3</sup> Because of this, it can be  
55 considered a public health problem, affecting up to 20% of the population in Europe and up to 60% in Asia.<sup>1,4</sup>

56 The current methods of treating MGD <sup>5</sup> involve heat in the form of warm compresses, a heated pad or  
57 goggles,<sup>5-8</sup> self-administered lid massage, and manual expression.<sup>9,10</sup> Several novel methods have also been  
58 investigated. The positive ophthalmic effects of intense pulsed light (IPL) on patients undergoing treatment for  
59 facial rosacea was discovered,<sup>11</sup> and IPL has gained clinicians attention as a treatment for the MGD.

60 <sup>14</sup> IPL therapy is widely used in the cosmetic industry and <sup>11</sup> for removal of hypertrichosis, benign cavernous  
61 hemangiomas, benign venous malformations, telangiectasias, port-wine stains, and pigmented lesions.<sup>12</sup> After  
62 IPL was recognized to be beneficial for MGD, several additional studies using IPL were performed for MGD  
63 treatment.<sup>13-21</sup> Most of the IPL treatments were performed with meibomian gland expression (MGX). However,  
64 <sup>6</sup> Craig et al.<sup>13</sup> and Jiang et al.<sup>19</sup> reported that IPL treatment alone can also improve the symptoms and signs of  
65 MGD. However, there has been no comparative study of IPL therapy and combination therapy (of IPL and  
66 MGX).

67 Therefore, in the current study, we investigated the treatment efficacy of combined therapy with MGX and  
68 IPL for MGD. This study is the first to compare IPL treatment alone with that of IPL and MGX.

69 **METHODS**

70 **Setting**

71 This is a prospective randomized clinical trial with a crossover design that compares the clinical outcomes of  
72 IPL alone with those of MGX plus IPL in MGD treatment. The study was approved by the Institutional Review  
73 Board (IRB) of Samsung Medical Center (IRB no. 2019-04-066) and adheres to the tenets of the Declaration of  
74 Helsinki. Written informed consent was obtained from all participants. The board approved the study on April  
75 15<sup>th</sup>, 2019 and completed the study on April 8<sup>th</sup>, 2020. The study is registered at ClinicalTrials.gov (identifier,  
76 NCT03950115; date of registration, 15/05/2019). The study was initiated after the approval of IRB, but the  
77 posting of this study to ClinicalTrials.gov was after the initial enrollment due to the delay in online PRS  
78 (protocol registration and results system) review process. The authors confirm that all ongoing and related trials  
79 for this drug/intervention are registered.

80 **Participants and design**

81 Patients diagnosed with MGD in their both eyes between April 18<sup>th</sup>, 2019 and October 28<sup>th</sup>, 2019 were  
82 enrolled in the study and treated by two ophthalmologists (T-Y.C. and B.J.K.) at Samsung Medical Center and  
83 Samsung Eye Clinic. The diagnosis of MGD was according to Japanese MGD diagnostic criteria; MGD was  
84 considered to be present when all of the following three signs/findings are present: (1) chronic ocular discomfort,  
85 (2) anatomic abnormalities around the meibomian gland orifices, and (3) obstruction of the meibomian glands.<sup>22</sup>  
86 Prior to enrollment, participants were screened for general health and current/recent use of medications.  
87 Participants were excluded if they had a medical condition (including pregnancy, breastfeeding, lupus, and any  
88 major uncontrolled health problem) in which IPL is contraindicated. Participants who wear contact lens or  
89 punctal plugs, had recent ocular surgery, recent thermal treatment for dry eye disease (e.g., LipiFlow), or recent  
90 meibomian gland expression were also excluded. The enrolled patients were allocated randomly with equal  
91 probability into two groups by independent clinical trial consultants. All patients underwent four treatment  
92 sessions two weeks apart in both eyes. Group 1 underwent IPL therapy with MGX at the first and second  
93 treatment sessions and IPL therapy alone at the third and fourth treatment sessions. Group 2 received IPL  
94 therapy alone at the first and second treatment sessions and IPL therapy with MGX at the third and fourth  
95 treatment sessions. The overall study design is summarized in Figure 1.

96 **Intervention**

97 IPL therapy was performed with the M22® (Lumenis, Dreieich, Germany) and administered to the skin  
98 below the lower eyelid. Before treatment, the eyes were protected with opaque goggles. Ultrasound gel was

99 applied to the patient's face from tragus to tragus including the nose to conduct the light, help spread the energy  
100 evenly, and provide a degree of protection.<sup>11</sup> The intensity of IPL treatment ranged from 9.8J/cm<sup>2</sup> to 13J/cm<sup>2</sup>  
101 according to Fitzpatrick Skin Type Grade.<sup>13</sup> MGX was performed immediately after IPL treatment on both  
102 upper and lower eyelids of each eye. To minimize pain during this procedure, the eye was numbed with a  
103 solution of proparacaine HCl 0.5% (Alcaine; Alcon Laboratories, Fort Worth, TX). MGX was performed by  
104 squeezing the meibomian glands with meibomian gland expressor forceps or with two Q-tips positioned on  
105 either side of the meibomian glands.

#### 106 **Outcomes**

107 Patients were evaluated immediately before the first treatment session (or the baseline [BL]), immediately  
108 before the third treatment session (first follow-up [FU1]), and two weeks after the fourth treatment session  
109 (second follow-up [FU2]). From BL to FU2, each patient was treated and followed for a total of eight weeks.

110 The meibograde was measured at BL using the Keratograph ® 5M (Oculus, Wetzlar, Germany) and graded  
111 using the Pult H method: 0 (meibomian gland area of loss = 0%), 1 (area of loss < 25%), 2 (area of loss 25-50%),  
112 3 (area of loss 51-75%), and 4 (area of loss >75%).<sup>23</sup> The severity of dry eye symptoms was evaluated using the  
113 Ocular Surface Disease Index (OSDI).<sup>24</sup> The severity of meibomian gland function was evaluated using the  
114 meibomian gland expressibility (MGE) score and the meibum quality (MQ) score. The MGE was assessed on a  
115 scale of 0 to 3 in five glands on the central lower lid and was scaled according to number of expressible glands  
116 as follows: 0 (all glands), 1 (three to four glands), 2 (one to two glands), and 3 (no glands).<sup>25</sup> Secretion quality  
117 was divided into the following four degrees: 0 (clear), 1 (cloudy), 2 (granular), and 3 (toothpaste).<sup>26</sup> We  
118 measured non-invasive tear break-up time (BUT) using Keratograph® 5M and fluorescein corneal staining  
119 grade to evaluate the ocular surface. Fluorescein corneal staining was enhanced by a yellow filter and graded  
120 using the Oxford Score (0 to 5 for the total cornea).<sup>27</sup>

#### 121 **Sample size calculation, randomization, and masking**

122 A total sample size of is 72 with an equal number in each sequence (i.e., a total of 144 repeated measurements)  
123 is required to infer that the mean difference in score improvement between two treatments ('IPL only' vs 'IPL  
124 plus MGX') is not equal to 0, when the medium effect size of 0.5 is considered, the significance level is 0.05,  
125 the power of 80% is expected for a two-sided t-test in the repeated ANOVA with a 2-period by 2-treatment  
126 cross-over design,<sup>28</sup> and the drop-out rate is 10%. 36 subjects were assigned to each treatment sequence, but 3  
127 subjects in group 1 and 9 subjects in group 2 were dropped-out during the follow-up. The drop-out rate was  
128 more than anticipated, but this reduced sample size of 60 subjects may not lead to great reduction on the

129 expected power of 80% for the following reasons. First, we used the GEE method that usually has higher power  
130 than LMM methods, including the repeated ANOVA.<sup>29</sup> Second, the data were collected from both eyes for each  
131 subject, and hence a total of 240 repeated measurements were used for analysis. This would help power  
132 increment to a certain degree.

133 The randomization process was implemented by independent clinical trial statisticians. Patients were  
134 randomized in 1:1 ratio using block randomization method with permuted blocks of 4 or 6 in size based on  
135 pre-allocated codes placed in sealed opaque envelopes that were opened during the randomization step. Due to  
136 the nature of the intervention, participants, healthcare professionals and researchers could not be blinded to  
137 group allocation. Only trial statisticians were masked to allocation.

### 138 **Statistical analyses**

139 Clinical features of both eyes of the participants were analyzed. The clinical parameters of both groups were  
140 compared at each point of the evaluation (BL, FU1, FU2) using the Wilcoxon rank-sum test. Analysis of the  
141 improvement after therapy was performed using Wilcoxon signed-rank test, which compared the BUT, Oxford  
142 grade, MGE, MQ, and OSDI scores at BL, FU1, and FU2. To separately evaluate the effect of MGX on score  
143 improvement, the generalized estimating equation (GEE) method was employed because it is known to be  
144 robust against the incorrect specification of the correlation structure among repeated measurements and hence  
145 produces consistent estimates, compared to the linear mixed effect model (LMM) method.<sup>30,31</sup> In the analysis of  
146 repeated measurements from a cross-over design, GEE methods usually showed better performance than LMM  
147 methods.<sup>29</sup> For the GEE model, dependent variables were defined as score changes from baseline to follow-up  
148 evaluations. First, univariable analysis was performed with age, sex, and baseline parameters (meibograde, BUT,  
149 Oxford grade, MGE, MQ, and OSDI) as confounders. In addition, any parameters with a p-value <0.1 on  
150 univariable analysis were adjusted at the final GEE analysis model for MGX effect. All statistical analyses were  
151 performed using Statistical Analysis System software version 9.4 (SAS Inc. Cary, NC).

152

153 **RESULTS**

154 The baseline demographics are shown in Table 1. Sixty participants (19 males and 41 females) finished all  
 155 four treatment sessions and underwent final evaluation. **Group 1 comprised 66 eyes from 33 subjects and Group**  
 156 **2 included 54 eyes from 27 subjects.** The mean participant age was  $57.52 \pm 10.50$  years (range, 32–78 years).  
 157 The baseline meibograde was  $2.19 \pm 0.98$ , BUT was  $4.49 \pm 1.32$ , Oxford corneal staining grade was  $1.46 \pm 0.62$ ,  
 158 MGE score was  $1.95 \pm 0.85$ , MQ score was  $2.09 \pm 0.56$ , and OSDI score was  $61.41 \pm 20.85$ . Overall, the  
 159 participants had severe dry eye symptoms and moderate to advanced MGD at baseline. **There were no**  
 160 statistically significant differences between the two groups regarding baseline meibograde, BUT, Oxford grade,  
 161 MGE, MQ, and OSDI.

162

163 **Table 1.** Baseline characteristics of the study subjects.

|                                  | Total             | Group 1           | Group 2           | p-value* |
|----------------------------------|-------------------|-------------------|-------------------|----------|
| <b>Number of patients (eyes)</b> | 60 (120)          | 33 (66)           | 27 (54)           |          |
| <b>Age</b>                       | $57.52 \pm 10.50$ | $58.00 \pm 10.73$ | $56.93 \pm 10.38$ | 0.845    |
| <b>Sex (male:female)</b>         | 19:41             | 10:23             | 9:18              | 1.000    |
| <b>Meibograde</b>                | $2.04 \pm 1.10$   | $2.19 \pm 1.11$   | $1.87 \pm 1.06$   | 0.165    |
| <b>BUT</b>                       | $4.39 \pm 1.50$   | $4.02 \pm 1.75$   | $4.60 \pm 1.32$   | 0.397    |
| <b>Oxford Grade</b>              | $1.46 \pm 0.62$   | $1.42 \pm 0.59$   | $1.50 \pm 0.67$   | 0.608    |
| <b>MGE</b>                       | $1.95 \pm 0.85$   | $1.97 \pm 0.77$   | $1.93 \pm 0.95$   | 0.837    |
| <b>MQ</b>                        | $2.09 \pm 0.56$   | $2.08 \pm 0.61$   | $2.11 \pm 0.50$   | 0.864    |
| <b>OSDI</b>                      | $61.41 \pm 20.85$ | $58.86 \pm 19.88$ | $64.92 \pm 21.88$ | 0.067    |

164 Numerical continuous parameters were described as means  $\pm$  standard deviations, and categorical parameters  
 165 were described as total numbers.

166 BUT=tear film break up time; MGE=meibomian gland expressibility score; MQ = meibum quality score;  
 167 OSDI=Ocular Surface Disease Index

168 \*p-values were obtained using the Wilcoxon rank-sum test for continuous data and the Fisher's exact test for  
 169 categorical data

170

171 Figure 2 demonstrates improvement in MGD indices after treatment sessions. Group 1 had a better BUT score  
 172 on the first follow-up compared to that of group 2 ( $p=0.049$ ). However, this difference was not observed at the  
 173 second follow-up. The Oxford grade, MGE, MQ, and OSDI did not differ between groups 1 and 2 at any point  
 174 in the evaluation. Compared to other parameters, MGE and MQ tended to respond faster to treatment than the  
 175 other parameters. Therefore, most of the improvement in MGE and MQ occurred between baseline and the first  
 176 follow-up visit. Table 2 shows that the ocular surface health (BUT, Oxford grade), meibomian gland function



177 (MGE, MQ), and dry eye symptoms (OSDI) of both groups significantly improved by the end of the four  
 178 treatment sessions (FU2 compared to BL). All parameters significantly improved at the first or second treatment  
 179 session (FU1 compared to BL). However, only BUT, Oxford grade, and OSDI improved at the third and fourth  
 180 treatment sessions in both groups (FU2 compared to FU1). There was no significant improvement in MGE or  
 181 MQ between FU1 and FU2 in either group 1 or 2.

182  
 183 **Figure 2.** Improvement of tear film break up time (BUT), Oxford grade, meibomian gland expressibility (MGE),  
 184 meibum quality (MQ), and Ocular Surface Disease Index (OSDI) after treatment. Group 1 received IPL plus  
 185 MGX at the first and second treatment sessions and IPL alone at the third and fourth treatment sessions. Group 2  
 186 received IPL alone at the first and second sessions and IPL plus MGX at the third and fourth sessions. At  
 187 baseline (BL), the two groups were comparable in every parameter. However, at the first follow-up (FU1),  
 188 group 1 showed improved BUT (\*). At the second follow-up (FU2), none of the parameters differed between  
 189 group 1 and group 2.

190

191 **Table 2.** Meibomian gland dysfunction scores before and after treatment.

|                  | BL            | FU1           | FU2           | p (BL–FU2)       | p (BL–FU1)       | p (FU1–FU2)      |
|------------------|---------------|---------------|---------------|------------------|------------------|------------------|
| <b>Group 1</b>   |               |               |               |                  |                  |                  |
| <b>BUT</b>       | 4.02 ± 1.75   | 6.02 ± 2.32   | 7.95 ± 2.54   | <b>0.004</b>     | <b>0.023</b>     | <b>0.002</b>     |
| <b>Oxford Gr</b> | 1.42 ± 0.59   | 0.72 ± 0.65   | 0.45 ± 0.60   | <b>&lt;0.001</b> | <b>&lt;0.001</b> | <b>0.042</b>     |
| <b>MGE</b>       | 1.97 ± 0.77   | 1.56 ± 0.69   | 1.42 ± 0.75   | <b>0.001</b>     | <b>&lt;0.001</b> | 0.388            |
| <b>MQ</b>        | 2.08 ± 0.61   | 0.20 ± 0.09   | 0.17 ± 0.09   | <b>&lt;0.001</b> | <b>&lt;0.001</b> | 0.645            |
| <b>OSDI</b>      | 58.86 ± 19.88 | 41.23 ± 26.46 | 27.75 ± 11.55 | <b>&lt;0.001</b> | <b>0.040</b>     | <b>0.002</b>     |
| <b>Group 2</b>   |               |               |               |                  |                  |                  |
| <b>BUT</b>       | 4.60 ± 1.32   | 4.86 ± 2.11   | 7.41 ± 3.37   | <b>0.005</b>     | <b>0.029</b>     | <b>0.007</b>     |
| <b>Oxford Gr</b> | 1.50 ± 0.67   | 0.80 ± 0.76   | 0.38 ± 0.49   | <b>&lt;0.001</b> | <b>&lt;0.001</b> | <b>0.030</b>     |
| <b>MGE</b>       | 1.93 ± 0.95   | 1.56 ± 0.79   | 1.50 ± 0.51   | <b>0.032</b>     | <b>&lt;0.001</b> | 0.333            |
| <b>MQ</b>        | 2.11 ± 0.50   | 0.19 ± 0.10   | 0.19 ± 0.06   | <b>&lt;0.001</b> | <b>&lt;0.001</b> | 0.333            |
| <b>OSDI</b>      | 64.92 ± 21.88 | 39.20 ± 15.42 | 26.55 ± 13.95 | <b>&lt;0.001</b> | <b>&lt;0.001</b> | <b>&lt;0.001</b> |

192 BL=baseline; FU1 (first follow-up) = 2 weeks after the second treatment session; FU2 (second follow-up) = 2  
 193 weeks after the fourth treatment session; BUT=tear film break up time; MGE=Meibomian gland expressibility  
 194 score; MQ = meibum quality score; OSDI=Ocular Surface Disease Index;

195 p-values were obtained using Wilcoxon signed-rank test

196

197 Addition of MGX to IPL led to score improvement only in BUT (p=0.003) while no improvement was

198 observed in Oxford grade, MGE, MQ, and OSDI (Table 3). That is, the combination of MGX and IPL improved  
199 BUT score by 2.701 on average more than did IPL therapy alone.

200

201 **Table 3.** The separate influence of MGX on meibomian gland dysfunction improvement

|                     | <b>Beta</b> | <b>95% CI of Beta</b> | <b>p-value</b> |
|---------------------|-------------|-----------------------|----------------|
| <b>BUT</b>          | 2.701       | (0.891,4.510)         | 0.003          |
| <b>Oxford grade</b> | 0.080       | (-0.258, 0.419)       | 0.642          |
| <b>MGE</b>          | 0.105       | (-0.365, 0.574)       | 0.663          |
| <b>MQ</b>           | 0.009       | (-0.040,0.058)        | 0.731          |
| <b>OSDI</b>         | -1.352      | (-14.464, 11.760)     | 0.840          |

202 MGX=meibomian gland expression; FU=follow-up; CI=confidence interval; BUT=tear film break up time;

203 MGE=meibomian gland expressibility score; MQ = meibum quality score; OSDI=Ocular Surface Disease Index;

204 The beta and p-values were calculated using a generalized estimating equation.

205

206 There were no significant adverse events during the study period.

207 **DISCUSSION**

208 This prospective crossover study demonstrates that IPL effectively improves subjective symptoms and  
209 objective ocular findings for MGD, and MGX along with IPL enhance improvement of BUT in MGD. Several  
210 previous studies found that IPL is effective in treatment of MGD. However, this study <sup>13</sup> is the first to directly  
211 investigate the separate effect of combination therapy with MGX and IPL. Our study also revealed that  
212 meibomian gland function (MGE and MQ) recovers faster with IPL therapy than do the other MGD parameters.  
213 Our findings are important to establish optimal practice guidelines in reference to MGX and IPL in treatment of  
214 MGD.

215 MGD is a highly prevalent ocular surface disease and <sup>10</sup> is one of the most common diseases encountered in an  
216 ophthalmology clinic. The conventional treatment for MGD remains transient, unsatisfactory, and not  
217 comprehensive. Therefore, there is a need for new therapeutic approaches to MGD. IPL treatment is a new  
218 treatment option for MGD patients and was incidentally found to be effective. The mechanism by which IPL is  
219 thought to be effective in MGD involves thermal heating of the glands, which melts the thickened meibum  
220 secretions and promotes gland dilation.<sup>11</sup> This dilation ultimately allows for effective clinical expression of the  
221 glands.<sup>11</sup> Other potential mechanisms for IPL to treat MGD include vascular thrombosis of abnormal blood  
222 vessels below the skin surrounding the eyes; activation of fibroblasts which leads to synthesis of new collagen  
223 fibers; reduction in bacterial and Demodex load on the eyelids; changes in levels of reactive oxygen species and  
224 inflammatory chemokines; and reduction in turnover of skin epithelial cells which cause obstruction of the  
225 meibomian glands.<sup>14,18</sup> Previous reports have shown <sup>22</sup> significantly improved dry eye symptoms and meibomian  
226 gland function after <sup>21</sup> combined therapy with IPL and MGX in participants with advanced MGD (that was non-  
227 responsive to LipiFlow treatment).<sup>17</sup> Since LipiFlow can also provide thermal gland heating and expression,  
228 these results suggest that IPL provides a therapeutic mechanism beyond that of thermal heating and expression  
229 alone.

230 The outcomes of IPL treatment of MGD in the current report are similar to recently published data. Craig et  
231 al.<sup>13</sup> found a benefit of IPL treatment without MGX in a prospective, double-masked, placebo-controlled,  
232 paired-eye study in a younger patient population (mean age 45 years) of 28 subjects. Subjects had improved  
233 lipid layer grade (p<0.001), noninvasive tear film BUT (p<0.001), and visual analog scale symptom score  
234 (p=0.015) in the study eye but showed no changes in tear meniscus height or tear evaporation rate with  
235 treatment. Similarly, <sup>1</sup> Toyos et al.<sup>11</sup> reported a significant improvement in tear BUT in 87% of patients in a three-  
236 year retrospective review of 91 <sup>1</sup> patients. In addition, 93% of the patients reported amelioration of symptoms

237 after treatment. Vora and Gupta<sup>15</sup> completed a retrospective review of patients with a diagnosis of evaporative  
238 dry eye disease who underwent three or more IPL treatments. These patients were evaluated at each visit for tear  
239 BUT, grade of eyelid and facial vascularity, eyelid margin edema, and meibom quality/flow and completed an  
240 OSDI questionnaire. From the first to last follow-up visit, there was a significant decrease in the clinical signs of  
241 MGD (p<0.001) and OSDI (p<0.001). There was also significant increase in oil flow score and tear BUT  
242 (p<0.001). Vegunta et al<sup>17</sup> reported a retrospective study of 81 patients with MGD and dry eye treated with  
243 serial IPL and MGX therapy. This group showed that the combination of IPL and MGX significantly improved  
244 dry eye symptoms (89% of subjects) and meibomian gland function (77% of subjects).<sup>17</sup>

245 Most IPL treatments for MGD were performed with MGX, while some other studies reported that IPL  
246 treatment alone can effectively improve the symptoms and signs of MGD. However, no prior study compared  
247 the treatment of MGD with combination therapy (with IPL and MPX) versus that of IPL alone. Therefore, our  
248 study is the first to demonstrate the separate effect of MGX upon IPL/MGX treatment for MGD. We found that  
249 BUT improvement is augmented by addition of MGX to IPL treatment. The effect of MGX toward other  
250 objective and subjective indices was not statistically significant.

251 There is a variety of methods for forceful expression of meibomian glands.<sup>32-34</sup> A limiting factor of all these  
252 methods, however, is associated pain that is only minimally relieved by topical anesthetics. Warm compresses  
253 and self-administered lid massage are frequently ineffective, and manual expression by a practitioner can be  
254 very painful for the patient.<sup>35</sup> The amount of pain increases rapidly as the force of expression exceeds 5 pounds  
255 per square inch (PSI)<sup>35</sup>. The usual maximal tolerable force is 15 PSI, which is frequently marginal or inadequate  
256 to express obstructive material.<sup>35</sup> To perform effective MGX, pain must be expected and tolerated. Therefore,  
257 before performing MGX for MGD, providers must consider the balance of BUT improvement with patient pain.  
258 The MGX should be deferred if a patient cannot tolerate the procedure due to pain.

259 There is no clinical guideline regarding optimal number of IPL treatments for MGD. In this study, BUT,  
260 MGE, MQ, Oxford grade, and OSDI value improved significantly from baseline to after four treatments (in both  
261 groups). This result is consistent with those of previous studies. Interestingly, meibomian gland function (MGE  
262 and MQ) responded rapidly to treatment and reached a plateau at FU1. There was no significant improvement in  
263 MGE or MQ between FU1 and FU2. In contrast, BUT and Oxford grade improved gradually from baseline to  
264 the last follow-up. Most previous studies of IPL in MGD only compared results from baseline and the last  
265 follow-up. Only one study reported serial changes in MGD symptoms/signs during IPL treatment sessions.<sup>19</sup>  
266 According to Jiang et al.,<sup>19</sup> MGD symptoms (including eyelid margin and meibomian gland assessments,

267 tearfilm BUT, conjunctival injection, and tear meniscus height), except corneal staining, significantly improved  
268 from baseline to treatment days D15, D45, and D75. However, they found no significant difference in symptoms  
269 or TBUT between D45 and D75. Based on these findings, we suggest that two sessions of IPL alone can  
270 effectively improve meibomian gland function (MGE and MQ), while four sessions are necessary for relieving  
271 corneal signs (BUT, Oxford grade) and subjective symptoms. Regardless, further studies are needed to define  
272 standards of IPL treatment for MGD.

273 Our study has several limitations. First, the last follow-up period was performed only 2 weeks after the end of  
274 all treatment sessions. This short follow-up period cannot predict the long-term outcomes of IPL and MGX  
275 treatments on MGD. A second limitation is that our study had a 2-week interval between treatments, which is  
276 different from the widely accepted protocol of a 3-week or longer interval. However, several studies have  
277 reported 2-week interval IPL treatment as effective in MGD and dry eye syndrome<sup>36</sup>, and the disease begin to  
278 improve 2 weeks after IPL treatment<sup>19,37</sup>. Therefore, the investigators believe the protocol in the present study is  
279 also effective in treating MGD and is worth reporting. A third limitation is that the current study might not have  
280 a long enough washout period for a crossover study. Since IPL was performed in every participant at every  
281 session as a baseline treatment, and meibomian gland expression (MGX) is the cross-over treatment, the  
282 investigators based the washout period on treatment effect of MGX. However, the duration of effect of MGX  
283 has not been explored well in the literature. We thought that a 2-week interval was an acceptable washout period  
284 for the following two reasons. First, a previous study regarding treatment effect of MGX on MGD<sup>38</sup> used a  
285 treatment interval of only one week. In addition, most MGD patients who visited a clinic and received MGX  
286 require additional MGX at the next visit. Considering those points, we carefully assumed that that 2 weeks  
287 would be an acceptable interval for loss of MGX effect. Future studies addressing these issues including small  
288 sample size and much longer wash out period is warranted to better understand the benefits of the MGX  
289 combined with IPL for MGD. A fourth limitation is that the patients could not be blinded toward their treatment,  
290 which may have biased their subjective improvement. However, we recognize that the inability to blind is an  
291 inherent problem of IPL and MGX treatments. Graig et al.<sup>13</sup> previously discussed the inherent difficulties and  
292 limitations associated with IPL and MGX since it is almost impossible to blind patients to treatment. A fifth  
293 limitation is that we did not analyze lid margin telangiectasia, which is critical for diagnosis and efficacy  
294 monitoring of MGD. Further research is necessary to evaluate the role of MGX on lid margin telangiectasia of  
295 MGD patients. Despite these limitations, our study has several strengths. This is the first study to investigate the  
296 separate effect of combined IPL plus MGX for MGD. In addition, unlike most prior studies on IPL and MGX

297 for MGD, our study demonstrated serial improvements in MGD indices during subsequent treatments.

298 In conclusion, IPL is an effective treatment method for MGD. Addition of MGX to IPL augments the  
299 improvement in BUT provided by IPL alone. Only two sessions of IPL were needed to improve meibomian  
300 gland function (MGE and MQ). Four IPL sessions were necessary to improve corneal signs (BUT, Oxford grade)  
301 and subjective symptoms. We believe that our results provide valuable information for development of optimal  
302 practice guidelines regarding IPL and MGX in treatment of MGD.

303 **ACKNOWLEDGEMENTS**

304 <sup>7</sup> We would like to thank Kyunga Kim, PhD and Min-Ji Kim, MS in Statistics and Data Center, Research Institute  
305 for Future Medicine at Samsung Medical Center for assistance with randomization and statistical analyses.

306

307 **AUTHOR CONTRIBUTIONS**

308 Tae-Young Chung and Byung Jin Kim designed the study. Kyoung Yoon Shin, Dong Hui Lim, Chan Hee Moon,  
309 <sup>8</sup> Byung Jin Kim, and Tae-Young Chung analyzed the clinical data. Kyoung Yoon Shin, Dong Hui Lim, Byung  
310 Jin Kim, and Tae-Young Chung reviewed the design and results and wrote/reviewed the final paper. Kyoung  
311 Yoon Shin and Dong Hui Lim equally <sup>7</sup> contributed to the manuscript as first authors. Byung Jin Kim and Tae-  
312 Young Chung contributed equally to the manuscript as corresponding authors. All authors read and approved  
313 the final manuscript.

314

315 **FUNDING AND SUPPORT**

316 None

317

318 **CONFLICT OF INTEREST**

319 No conflicting relationship exists for any author.

320

321 <sup>16</sup> **DATA AVAILABILITY**

322 All relevant data are within the manuscript and its Supporting Information files.

323 **REFERENCES**

- 324 1. Nichols KK, Foulks GN, Bron AJ, et al. The international workshop on meibomian gland  
325 dysfunction: executive summary. *Invest Ophthalmol Vis Sci.* 2011;52(4):1922-1929.
- 326 2. Mathers WD. Ocular evaporation in meibomian gland dysfunction and dry eye.  
327 *Ophthalmology.* 1993;100(3):347-351.
- 328 3. Shimazaki J, Sakata M, Tsubota K. Ocular surface changes and discomfort in patients with  
329 meibomian gland dysfunction. *Arch Ophthalmol.* 1995;113(10):1266-1270.
- 330 4. Schaumberg DA, Nichols JJ, Papas EB, et al. The international workshop on meibomian  
331 gland dysfunction: report of the subcommittee on the epidemiology of, and associated  
332 risk factors for, MGD. *Invest Ophthalmol Vis Sci.* 2011;52(4):1994-2005.
- 333 5. Matsumoto Y, Dogru M, Goto E, et al. Efficacy of a new warm moist air device on tear  
334 functions of patients with simple meibomian gland dysfunction. *Cornea.* 2006;25(6):644-  
335 650.
- 336 6. Mori A, Oguchi Y, Goto E, et al. Efficacy and safety of infrared warming of the eyelids.  
337 *Cornea.* 1999;18(2):188-193.
- 338 7. Mitra M, Menon GJ, Casini A, et al. Tear film lipid layer thickness and ocular comfort after  
339 meibomian therapy via latent heat with a novel device in normal subjects. *Eye (Lond).*  
340 2005;19(6):657-660.
- 341 8. Nam SW, Lim DH, Hyun J, Chung T-Y. Effects and Prognostic Factors of Automated  
342 Thermodynamic System Treatment for Meibomian Gland Dysfunction. *J Korean*  
343 *Ophthalmol Soc.* 2016;57(5):724-733.
- 344 9. Craig JP, Blades K, Patel S. Tear lipid layer structure and stability following expression of  
345 the meibomian glands. *Ophthalmic Physiol Opt.* 1995;15(6):569-574.
- 346 10. Olson MC, Korb DR, Greiner JV. Increase in tear film lipid layer thickness following  
347 treatment with warm compresses in patients with meibomian gland dysfunction. *Eye*  
348 *Contact Lens.* 2003;29(2):96-99.
- 349 11. Toyos R, McGill W, Briscoe D. Intense pulsed light treatment for dry eye disease due to  
350 meibomian gland dysfunction; a 3-year retrospective study. *Photomed Laser Surg.*  
351 2015;33(1):41-46.
- 352 12. Raulin C, Greve B, Grema H. IPL technology: a review. *Lasers Surg Med.* 2003;32(2):78-87.
- 353 13. Craig JP, Chen YH, Turnbull PR. Prospective trial of intense pulsed light for the treatment of  
354 meibomian gland dysfunction. *Invest Ophthalmol Vis Sci.* 2015;56(3):1965-1970.
- 355 14. Dell SJ, Gaster RN, Barbarino SC, Cunningham DN. Prospective evaluation of intense  
356 pulsed light and meibomian gland expression efficacy on relieving signs and symptoms of  
357 dry eye disease due to meibomian gland dysfunction. *Clin Ophthalmol.* 2017;11:817-827.
- 358 15. Gupta PK, Vora GK, Matossian C, et al. Outcomes of intense pulsed light therapy for  
359 treatment of evaporative dry eye disease. *Can J Ophthalmol.* 2016;51(4):249-253.
- 360 16. Vora GK, Gupta PK. Intense pulsed light therapy for the treatment of evaporative dry eye  
361 disease. *Curr Opin Ophthalmol.* 2015;26(4):314-318.



- 362 17. Vegunta S, Patel D, Shen JF. Combination Therapy of Intense Pulsed Light Therapy and  
363 Meibomian Gland Expression (IPL/MGX) Can Improve Dry Eye Symptoms and Meibomian  
364 Gland Function in Patients With Refractory Dry Eye: A Retrospective Analysis. *Cornea*.  
365 2016;35(3):318-322.
- 366 18. Dell SJ. Intense pulsed light for evaporative dry eye disease. *Clin Ophthalmol*.  
367 2017;11:1167-1173.
- 368 19. Jiang X, Lv H, Song H, et al. Evaluation of the Safety and Effectiveness of Intense Pulsed  
369 Light in the Treatment of Meibomian Gland Dysfunction. *J Ophthalmol*. 2016;2016:1910694.
- 370 20. Arita R, Mizoguchi T, Fukuoka S, Morishige N. Multicenter Study of Intense Pulsed Light  
371 Therapy for Patients With Refractory Meibomian Gland Dysfunction. *Cornea*.  
372 2018;37(12):1566-1571.
- 373 21. Arita R, Fukuoka S, Morishige N. Therapeutic efficacy of intense pulsed light in patients  
374 with refractory meibomian gland dysfunction. *Ocul Surf*. 2019;17(1):104-110.
- 375 22. Amano S. Meibomian Gland Dysfunction: Recent Progress Worldwide and in Japan. *Invest*  
376 *Ophthalmol Vis Sci*. 2018;59(14):DES87-DES93.
- 377 23. Pult H, Nichols JJ. A review of meibography. *Optom Vis Sci*. 2012;89(5):E760-769.
- 378 24. Asiedu K, Kyei S, Mensah SN, et al. Ocular Surface Disease Index (OSDI) Versus the  
379 Standard Patient Evaluation of Eye Dryness (SPEED): A Study of a Nonclinical Sample.  
380 *Cornea*. 2016;35(2):175-180.
- 381 25. Tomlinson A, Bron AJ, Korb DR, et al. The international workshop on meibomian gland  
382 dysfunction: report of the diagnosis subcommittee. *Invest Ophthalmol Vis Sci*.  
383 2011;52(4):2006-2049.
- 384 26. Arita R, Minoura I, Morishige N, et al. Development of Definitive and Reliable Grading  
385 Scales for Meibomian Gland Dysfunction. *Am J Ophthalmol*. 2016;169:125-137.
- 386 27. Bron AJ, Evans VE, Smith JA. Grading of corneal and conjunctival staining in the context of  
387 other dry eye tests. *Cornea*. 2003;22(7):640-650.
- 388 28. Julious SA. Sample sizes for clinical trials with normal data. *Stat Med*. 2004;23(12):1921-  
389 1986.
- 390 29.
- 391 30. LIANG K-Y, ZEGER SL. Longitudinal data analysis using generalized linear models.  
392 *Biometrika*. 1986;73(1):13-22.
- 393 31. Hubbard AE, Ahern J, Fleischer NL, et al. To GEE or not to GEE: comparing population  
394 average and mixed models for estimating the associations between neighborhood risk  
395 factors and health. *Epidemiology*. 2010;21(4):467-474.
- 396 32. Hom MM, Silverman MW. Displacement technique and meibomian gland expression. *J Am*  
397 *Optom Assoc*. 1987;58(3):223-226.
- 398 33. Korb DR, Greiner JV. Increase in tear film lipid layer thickness following treatment of  
399 meibomian gland dysfunction. *Adv Exp Med Biol*. 1994;350:293-298.
- 400 34. McCulley JP, Sciallis GF. Meibomian keratoconjunctivitis. *Am J Ophthalmol*. 1977;84(6):788-

- 401 793.
- 402 35. Korb DR, Blackie CA. Meibomian gland therapeutic expression: quantifying the applied  
403 pressure and the limitation of resulting pain. *Eye Contact Lens*. 2011;37(5):298-301.
- 404 36. Guilloto Caballero S, Garcia Madrona JL, Colmenero Reina E. Effect of pulsed laser light in  
405 patients with dry eye syndrome. *Arch Soc Esp Oftalmol*. 2017;92(11):509-515.
- 406 37. Piyacomn Y, Kasetsuwan N, Reinprayoon U, et al. Efficacy and Safety of Intense Pulsed  
407 Light in Patients With Meibomian Gland Dysfunction-A Randomized, Double-Masked,  
408 Sham-Controlled Clinical Trial. *Cornea*. 2019.
- 409 38. Lee H, Kim M, Park SY, et al. Mechanical meibomian gland squeezing combined with  
410 eyelid scrubs and warm compresses for the treatment of meibomian gland dysfunction.  
411 *Clin Exp Optom*. 2017;100(6):598-602.

412

# Intense Pulsed Light plus Meibomian Gland Expression versus Intense Pulsed Light alone for Meibomian Gland Dysfunction: A Randomized Crossover Study

ORIGINALITY REPORT

11%

SIMILARITY INDEX

## PRIMARY SOURCES

- 1 Vora, Gargi K., and Preeya K. Gupta. "Intense pulsed light therapy for the treatment of evaporative dry eye disease :", *Current Opinion in Ophthalmology*, 2015.  
Crossref 63 words — 1%
- 2 [www.clinicaltrials.gov](http://www.clinicaltrials.gov)  
Internet 52 words — 1%
- 3 [www.bktimes.net](http://www.bktimes.net)  
Internet 48 words — 1%
- 4 [www.tfosdewsreport.org](http://www.tfosdewsreport.org)  
Internet 45 words — 1%
- 5 [socosc.com](http://socosc.com)  
Internet 38 words — 1%
- 6 Sheng-nan Cheng, Fa-gang Jiang, Hua Chen, Hui Gao, Yu-kan Huang. "Intense Pulsed Light Therapy for Patients with Meibomian Gland Dysfunction and Ocular Demodex Infestation", *Current Medical Science*, 2019  
Crossref 36 words — 1%
- 7 Seung Wan Nam, Dong Hui Lim, Kyu Yeon Cho, Hye Seung Kim, Kyunga Kim, Tae-Young Chung. "Risk factors of presenile nuclear cataract in health screening study", *BMC Ophthalmology*, 2018  
Crossref 34 words — 1%
- 8 Sungsoon Hwang, Dong Hui Lim, Tae-Young Chung. "Prevalence

and Incidence of Keratoconus in South Korea: A Nationwide Population-Based Study", American Journal of Ophthalmology, 2018  
Crossref 34 words — 1%

9 Preeya K. Gupta, Gargi K. Vora, Cynthia Matossian, Michelle Kim, Sandra Stinnett. "Outcomes of intense pulsed light therapy for treatment of evaporative dry eye disease", Canadian Journal of Ophthalmology / Journal Canadien d'Ophtalmologie, 2016  
Crossref 31 words — 1%

10 [www.science.gov](http://www.science.gov)  
Internet 27 words — 1%

11 [journals.lww.com](http://journals.lww.com)  
Internet 24 words — < 1%

12 [synapse.koreamed.org](http://synapse.koreamed.org)  
Internet 22 words — < 1%

13 [arrow.tudublin.ie](http://arrow.tudublin.ie)  
Internet 19 words — < 1%

14 [iovs.arvojournals.org](http://iovs.arvojournals.org)  
Internet 19 words — < 1%

15 Jeung Hui Pyo, Hyuk Lee, Byung-Hoon Min, Jun Haeng Lee et al. "Comparison of Long-Term Outcomes After Non-curative Endoscopic Resection in Older Patients with Early Gastric Cancer", Annals of Surgical Oncology, 2017  
Crossref 15 words — < 1%

16 [journals.plos.org](http://journals.plos.org)  
Internet 14 words — < 1%

17 Gyule Han, Jisang Han, Kyungdo Han, Jinyoung Youn, Tae-Young Chung, Dong Hui Lim. "Visual Acuity and Development of Parkinson's Disease: A Nationwide Cohort Study", Movement Disorders, 2020  
Crossref 13 words — < 1%

---

|    |                                                                              |                 |
|----|------------------------------------------------------------------------------|-----------------|
| 18 | <a href="http://www.thieme-connect.de">www.thieme-connect.de</a><br>Internet | 12 words — < 1% |
| 19 | <a href="http://mafiadoc.com">mafiadoc.com</a><br>Internet                   | 10 words — < 1% |
| 20 | <a href="http://effiloop.com">effiloop.com</a><br>Internet                   | 9 words — < 1%  |
| 21 | <a href="http://www.lime.jp">www.lime.jp</a><br>Internet                     | 9 words — < 1%  |
| 22 | <a href="http://www.esw-vision.com">www.esw-vision.com</a><br>Internet       | 9 words — < 1%  |

---

EXCLUDE QUOTES ON

EXCLUDE  
BIBLIOGRAPHY ON

EXCLUDE MATCHES < 1%
